# Supplementary material for: Axonal dying back of upper motor neurons in human ALS
Source: Research Square preprint supplement (doi:10.21203/rs.3.rs-8545414/v1), 2026-01-12
Supplement: Supplementary file 1 [file e158a1a4851b31009138591e.xlsx]

## Sheet: MedullaBulbarvsNoBulbar
Medulla: Bulbar vs. No-bulbar (arm+leg) onset
Category	Term	Genes	Count	List Total	Pop Hits	Pop Total	P-Value	Benjamini	Fold Enrichment	Bonferroni	FDR	Fisher Exact
GOTERM_BP_FAT	inflammatory response	0.0821	23	203	611	19401	4.45e-07	0.00149	3.6	0.00149	0.00146	1.19e-07
GOTERM_BP_FAT	positive regulation of immune system process	0.1071	30	203	1083	19401	2.78e-06	0.00465	2.65	0.00925	0.00457	1.02e-06
GOTERM_BP_FAT	regulation of immune system process	0.1429	40	203	1752	19401	4.24e-06	0.00472	2.18	0.0141	0.00465	1.89e-06
GOTERM_BP_FAT	response to external stimulus	0.1536	43	203	2072	19401	1.72e-05	0.0144	1.98	0.0558	0.0141	8.44e-06
GOTERM_BP_FAT	Fc receptor signaling pathway	0.025	7	203	60	19401	3.71e-05	0.0215	11.15	0.117	0.0212	2.99e-06
GOTERM_BP_FAT	Fc-gamma receptor signaling pathway	0.0214	6	203	37	19401	3.87e-05	0.0215	15.5	0.121	0.0212	2.16e-06
GOTERM_BP_FAT	immune response-regulating signaling pathway	0.0571	16	203	432	19401	4.97e-05	0.0216	3.54	0.153	0.0213	1.34e-05
GOTERM_BP_FAT	cilium movement	0.0429	12	203	245	19401	5.42e-05	0.0216	4.68	0.166	0.0213	1.1e-05
GOTERM_BP_FAT	stress response to metal ion	0.0179	5	203	21	19401	5.94e-05	0.0216	22.76	0.18	0.0213	2.12e-06
GOTERM_BP_FAT	immune response-regulating cell surface receptor signaling pathway	0.0464	13	203	295	19401	6.48e-05	0.0216	4.21	0.195	0.0213	1.47e-05
GOTERM_BP_FAT	detoxification of inorganic compound	0.0179	5	203	23	19401	8.65e-05	0.0263	20.78	0.251	0.0258	3.45e-06
GOTERM_BP_FAT	defense response	0.1214	34	203	1589	19401	0.000102	0.0284	2.04	0.289	0.028	4.84e-05
GOTERM_BP_FAT	cellular response to metal ion	0.0357	10	203	183	19401	0.000132	0.0302	5.22	0.356	0.0297	2.37e-05
GOTERM_BP_FAT	cellular response to cadmium ion	0.0179	5	203	26	19401	0.000143	0.0302	18.38	0.379	0.0297	6.57e-06
GOTERM_BP_FAT	regulation of immune response	0.0929	26	203	1080	19401	0.000152	0.0302	2.3	0.399	0.0297	6.4e-05
GOTERM_BP_FAT	epithelial cilium movement involved in extracellular fluid movement	0.0214	6	203	49	19401	0.000153	0.0302	11.7	0.4	0.0297	1.17e-05
GOTERM_BP_FAT	regulation of non-canonical NF-kappaB signal transduction	0.0286	8	203	110	19401	0.000154	0.0302	6.95	0.402	0.0297	2.06e-05
GOTERM_BP_FAT	positive regulation of acute inflammatory response	0.0179	5	203	28	19401	0.000192	0.0356	17.07	0.473	0.0351	9.65e-06
GOTERM_BP_FAT	extracellular transport	0.0214	6	203	52	19401	0.000203	0.0358	11.03	0.493	0.0352	1.66e-05
GOTERM_BP_FAT	homeostatic process	0.1143	32	203	1543	19401	0.000305	0.0509	1.98	0.639	0.0501	0.000149
GOTERM_BP_FAT	response to toxic substance	0.0393	11	203	261	19401	0.000426	0.0674	4.03	0.759	0.0663	0.0001
GOTERM_BP_FAT	response to biotic stimulus	0.1143	32	203	1580	19401	0.000457	0.0674	1.94	0.783	0.0663	0.000228
GOTERM_BP_FAT	intracellular zinc ion homeostasis	0.0179	5	203	35	19401	0.000464	0.0674	13.65	0.788	0.0663	3e-05
GOTERM_BP_FAT	positive regulation of non-canonical NF-kappaB signal transduction	0.0214	6	203	67	19401	0.000666	0.0842	8.56	0.892	0.0829	7.15e-05
GOTERM_BP_FAT	female pregnancy	0.0321	9	203	183	19401	0.000681	0.0842	4.7	0.897	0.0829	0.000136
GOTERM_BP_FAT	cell motility	0.0929	26	203	1198	19401	0.000715	0.0853	2.07	0.908	0.0839	0.000332
GOTERM_BP_FAT	spermatid development	0.0357	10	203	237	19401	0.000874	0.101	4.03	0.946	0.099	0.000205
GOTERM_BP_FAT	axoneme assembly	0.025	7	203	109	19401	0.000984	0.104	6.14	0.963	0.102	0.00015
GOTERM_BP_FAT	inorganic ion homeostasis	0.05	14	203	455	19401	0.000998	0.104	2.94	0.964	0.102	0.000324
GOTERM_BP_FAT	cell surface receptor signaling pathway	0.1393	39	203	2182	19401	0.001	0.104	1.71	0.965	0.102	0.000568
GOTERM_BP_FAT	response to bacterium	0.0679	19	203	760	19401	0.00103	0.104	2.39	0.968	0.102	0.000412
GOTERM_BP_FAT	spermatid differentiation	0.0357	10	203	245	19401	0.0011	0.106	3.9	0.975	0.104	0.000267
GOTERM_BP_FAT	microtubule-based movement	0.05	14	203	461	19401	0.00113	0.106	2.9	0.977	0.104	0.000371
GOTERM_BP_FAT	immune system process	0.1536	43	203	2511	19401	0.00117	0.106	1.64	0.98	0.104	0.000691
GOTERM_BP_FAT	response to metal ion	0.0429	12	203	351	19401	0.00118	0.106	3.27	0.98	0.104	0.000342
GOTERM_BP_FAT	chemotaxis	0.0429	12	203	353	19401	0.00123	0.106	3.25	0.983	0.105	0.000356
GOTERM_BP_FAT	response to other organism	0.1071	30	203	1535	19401	0.00128	0.106	1.87	0.986	0.105	0.00066
GOTERM_BP_FAT	taxis	0.0429	12	203	355	19401	0.00128	0.106	3.23	0.986	0.105	0.000378
GOTERM_BP_FAT	response to external biotic stimulus	0.1071	30	203	1538	19401	0.00132	0.106	1.86	0.988	0.105	0.000682
GOTERM_BP_FAT	multi-organism reproductive process	0.0321	9	203	204	19401	0.00137	0.106	4.22	0.99	0.105	0.000307
GOTERM_BP_FAT	acute inflammatory response	0.0214	6	203	79	19401	0.00141	0.106	7.26	0.991	0.105	0.00018
GOTERM_BP_FAT	leukocyte migration	0.0357	10	203	255	19401	0.00145	0.106	3.75	0.992	0.105	0.000368
GOTERM_BP_FAT	positive regulation of multicellular organismal process	0.1179	33	203	1773	19401	0.0015	0.106	1.78	0.993	0.105	0.000812
GOTERM_BP_FAT	regulation of leukocyte degranulation	0.0179	5	203	48	19401	0.00155	0.106	9.96	0.994	0.105	0.000142
GOTERM_BP_FAT	cell adhesion	0.0786	22	203	989	19401	0.00156	0.106	2.13	0.995	0.105	0.000707
GOTERM_BP_FAT	myeloid leukocyte activation	0.0286	8	203	162	19401	0.00157	0.106	4.72	0.995	0.105	0.000312
GOTERM_BP_FAT	monoatomic ion homeostasis	0.0536	15	203	538	19401	0.00157	0.106	2.66	0.995	0.105	0.000563
GOTERM_BP_FAT	regulation of response to external stimulus	0.0893	25	203	1198	19401	0.00159	0.106	1.99	0.995	0.105	0.000769
GOTERM_BP_FAT	regulation of acute inflammatory response	0.0179	5	203	49	19401	0.00168	0.11	9.75	0.996	0.108	0.000157
GOTERM_BP_FAT	regulation of cell activation	0.0607	17	203	667	19401	0.00171	0.11	2.44	0.997	0.108	0.000672
GOTERM_BP_FAT	regulation of leukocyte activation	0.0571	16	203	606	19401	0.00176	0.111	2.52	0.997	0.109	0.000665
GOTERM_BP_FAT	multi-multicellular organism process	0.0321	9	203	213	19401	0.0018	0.111	4.04	0.998	0.109	0.00042
GOTERM_BP_FAT	motile cilium assembly	0.0214	6	203	84	19401	0.00185	0.112	6.83	0.998	0.11	0.000251
GOTERM_BP_FAT	inflammatory response to antigenic stimulus	0.0179	5	203	51	19401	0.00194	0.114	9.37	0.998	0.112	0.00019
GOTERM_BP_FAT	response to cadmium ion	0.0179	5	203	52	19401	0.00209	0.116	9.19	0.999	0.114	0.000208
GOTERM_BP_FAT	regulation of leukocyte mediated immunity	0.0357	10	203	270	19401	0.00215	0.116	3.54	0.999	0.114	0.000575
GOTERM_BP_FAT	locomotion	0.0429	12	203	379	19401	0.00215	0.116	3.03	0.999	0.114	0.000676
GOTERM_BP_FAT	response to zinc ion	0.0179	5	203	55	19401	0.00257	0.133	8.69	1.00e+0	0.131	0.000272
GOTERM_BP_FAT	cellular response to chemical stimulus	0.1286	36	203	2066	19401	0.00259	0.133	1.67	1.00e+0	0.131	0.0015
GOTERM_BP_FAT	regulation of leukocyte proliferation	0.0357	10	203	283	19401	0.00294	0.149	3.38	1.00e+0	0.146	0.000825
GOTERM_BP_FAT	regulation of transport	0.1107	31	203	1709	19401	0.00321	0.158	1.73	1.00e+0	0.155	0.00179
GOTERM_BP_FAT	cilium organization	0.0429	12	203	400	19401	0.00327	0.158	2.87	1.00e+0	0.156	0.00108
GOTERM_BP_FAT	regulation of myeloid leukocyte mediated immunity	0.0179	5	203	59	19401	0.00332	0.158	8.1	1.00e+0	0.156	0.000378
GOTERM_BP_FAT	response to cytokine	0.0714	20	203	916	19401	0.00337	0.158	2.09	1.00e+0	0.156	0.00155
GOTERM_BP_FAT	positive regulation of immune response	0.0607	17	203	717	19401	0.0035	0.158	2.27	1.00e+0	0.156	0.00148
GOTERM_BP_FAT	flagellated sperm motility	0.0286	8	203	188	19401	0.00361	0.158	4.07	1.00e+0	0.156	0.000837
GOTERM_BP_FAT	sperm motility	0.0286	8	203	188	19401	0.00361	0.158	4.07	1.00e+0	0.156	0.000837
GOTERM_BP_FAT	microtubule bundle formation	0.025	7	203	141	19401	0.00362	0.158	4.74	1.00e+0	0.156	0.000718
GOTERM_BP_FAT	defense response to other organism	0.0821	23	203	1137	19401	0.0038	0.161	1.93	1.00e+0	0.158	0.00188
GOTERM_BP_FAT	response to peptide	0.0714	20	203	932	19401	0.00407	0.17	2.05	1.00e+0	0.167	0.0019
GOTERM_BP_FAT	cell projection assembly	0.0464	13	203	474	19401	0.0042	0.173	2.62	1.00e+0	0.17	0.00151
GOTERM_BP_FAT	regulation of lymphocyte proliferation	0.0321	9	203	252	19401	0.00501	0.192	3.41	1.00e+0	0.189	0.0014
GOTERM_BP_FAT	cilium assembly	0.0393	11	203	365	19401	0.00507	0.192	2.88	1.00e+0	0.189	0.00167
GOTERM_BP_FAT	detoxification	0.025	7	203	152	19401	0.00522	0.195	4.4	1.00e+0	0.191	0.00112
GOTERM_BP_FAT	regulation of lipid catabolic process	0.0179	5	203	67	19401	0.00524	0.195	7.13	1.00e+0	0.191	0.000681
GOTERM_BP_FAT	cilium movement involved in cell motility	0.0286	8	203	202	19401	0.00533	0.196	3.79	1.00e+0	0.193	0.00133
GOTERM_BP_FAT	regulation of mononuclear cell proliferation	0.0321	9	203	257	19401	0.00561	0.203	3.35	1.00e+0	0.2	0.00159
GOTERM_BP_FAT	negative regulation of cell differentiation	0.0607	17	203	754	19401	0.00565	0.203	2.15	1.00e+0	0.2	0.0025
GOTERM_BP_FAT	cilium-dependent cell motility	0.0286	8	203	205	19401	0.00577	0.203	3.73	1.00e+0	0.2	0.00146
GOTERM_BP_FAT	cilium or flagellum-dependent cell motility	0.0286	8	203	205	19401	0.00577	0.203	3.73	1.00e+0	0.2	0.00146
GOTERM_BP_FAT	biological process involved in interspecies interaction between organisms	0.1071	30	203	1707	19401	0.00595	0.207	1.68	1.00e+0	0.204	0.0034
GOTERM_BP_FAT	positive regulation of ERK1 and ERK2 cascade	0.0286	8	203	207	19401	0.00607	0.209	3.69	1.00e+0	0.205	0.00155
GOTERM_BP_FAT	chemical homeostasis	0.0714	20	203	969	19401	0.00613	0.209	1.97	1.00e+0	0.205	0.00297
GOTERM_BP_FAT	intracellular monoatomic cation homeostasis	0.0429	12	203	441	19401	0.00668	0.223	2.6	1.00e+0	0.22	0.00242
GOTERM_BP_FAT	myeloid leukocyte mediated immunity	0.0179	5	203	72	19401	0.00676	0.224	6.64	1.00e+0	0.22	0.000946
GOTERM_BP_FAT	response to type II interferon	0.0214	6	203	114	19401	0.00684	0.224	5.03	1.00e+0	0.22	0.00127
GOTERM_BP_FAT	innate immune response	0.0643	18	203	844	19401	0.00726	0.235	2.04	1.00e+0	0.232	0.00339
GOTERM_BP_FAT	regulation of defense response	0.0679	19	203	916	19401	0.00741	0.238	1.98	1.00e+0	0.234	0.00356
GOTERM_BP_FAT	immune effector process	0.0464	13	203	512	19401	0.00756	0.24	2.43	1.00e+0	0.236	0.00295
GOTERM_BP_FAT	intracellular monoatomic ion homeostasis	0.0429	12	203	450	19401	0.0077	0.24	2.55	1.00e+0	0.236	0.00286
GOTERM_BP_FAT	cytokine-mediated signaling pathway	0.0429	12	203	451	19401	0.00783	0.24	2.54	1.00e+0	0.236	0.00292
GOTERM_BP_FAT	regulation of secretion	0.0536	15	203	647	19401	0.008	0.243	2.22	1.00e+0	0.239	0.00343
GOTERM_BP_FAT	regulation of localization	0.125	35	203	2146	19401	0.00839	0.252	1.56	1.00e+0	0.248	0.00518
GOTERM_BP_FAT	regulation of inflammatory response	0.0429	12	203	457	19401	0.00861	0.257	2.51	1.00e+0	0.253	0.00324
GOTERM_BP_FAT	immune response	0.1107	31	203	1839	19401	0.009	0.263	1.61	1.00e+0	0.258	0.00536
GOTERM_BP_FAT	regulation of secretion by cell	0.05	14	203	590	19401	0.00905	0.263	2.27	1.00e+0	0.258	0.00378
GOTERM_BP_FAT	plasma membrane bounded cell projection assembly	0.0429	12	203	461	19401	0.00914	0.263	2.49	1.00e+0	0.259	0.00348
GOTERM_BP_FAT	monoatomic cation homeostasis	0.0464	13	203	526	19401	0.00924	0.264	2.36	1.00e+0	0.26	0.00371
GOTERM_BP_FAT	immune response-activating signaling pathway	0.0357	10	203	342	19401	0.00972	0.273	2.79	1.00e+0	0.268	0.00329
GOTERM_BP_FAT	positive regulation of defense response	0.0429	12	203	466	19401	0.00984	0.273	2.46	1.00e+0	0.268	0.00379
GOTERM_BP_FAT	positive regulation of leukocyte proliferation	0.025	7	203	174	19401	0.00988	0.273	3.84	1.00e+0	0.268	0.0024
GOTERM_BP_FAT	regulation of lymphocyte activation	0.0464	13	203	533	19401	0.0102	0.28	2.33	1.00e+0	0.276	0.00416
GOTERM_BP_FAT	positive regulation of response to stimulus	0.1357	38	203	2426	19401	0.0107	0.291	1.5	1.00e+0	0.286	0.00689
GOTERM_BP_FAT	circulatory system process	0.0464	13	203	538	19401	0.011	0.295	2.31	1.00e+0	0.29	0.00448
GOTERM_BP_FAT	cellular response to cytokine stimulus	0.0607	17	203	815	19401	0.0114	0.305	1.99	1.00e+0	0.3	0.00544
GOTERM_BP_FAT	regulation of ossification	0.0214	6	203	130	19401	0.0117	0.31	4.41	1.00e+0	0.305	0.00248
GOTERM_BP_FAT	regulation of insulin secretion	0.025	7	203	181	19401	0.0118	0.31	3.7	1.00e+0	0.305	0.00301
GOTERM_BP_FAT	positive regulation of response to external stimulus	0.05	14	203	611	19401	0.0119	0.31	2.19	1.00e+0	0.305	0.00514
GOTERM_BP_FAT	regulation of leukocyte chemotaxis	0.0214	6	203	133	19401	0.0128	0.332	4.31	1.00e+0	0.326	0.00278
GOTERM_BP_FAT	regulation of leukocyte migration	0.0286	8	203	243	19401	0.0139	0.352	3.15	1.00e+0	0.347	0.00416
GOTERM_BP_FAT	regulation of immune effector process	0.0393	11	203	427	19401	0.0143	0.359	2.46	1.00e+0	0.353	0.00547
GOTERM_BP_FAT	cellular response to type II interferon	0.0179	5	203	90	19401	0.0145	0.359	5.31	1.00e+0	0.353	0.00256
GOTERM_BP_FAT	regulation of myeloid leukocyte differentiation	0.0214	6	203	138	19401	0.0148	0.359	4.16	1.00e+0	0.353	0.00334
GOTERM_BP_FAT	regulation of cytokine production	0.0643	18	203	914	19401	0.0151	0.363	1.88	1.00e+0	0.357	0.00762
GOTERM_BP_FAT	multicellular organismal reproductive process	0.0714	20	203	1064	19401	0.0155	0.369	1.8	1.00e+0	0.363	0.00821
GOTERM_BP_FAT	response to molecule of bacterial origin	0.0357	10	203	370	19401	0.0156	0.369	2.58	1.00e+0	0.363	0.00568
GOTERM_BP_FAT	regulation of vesicle-mediated transport	0.0464	13	203	566	19401	0.0157	0.37	2.2	1.00e+0	0.364	0.00677
GOTERM_BP_FAT	response to stress	0.1857	52	203	3689	19401	0.017	0.391	1.35	1.00e+0	0.385	0.0122
GOTERM_BP_FAT	myeloid leukocyte migration	0.0214	6	203	144	19401	0.0175	0.4	3.98	1.00e+0	0.394	0.00412
GOTERM_BP_FAT	positive regulation of leukocyte activation	0.0357	10	203	380	19401	0.0183	0.412	2.52	1.00e+0	0.406	0.00687
GOTERM_BP_FAT	cell development	0.1286	36	203	2351	19401	0.0184	0.412	1.46	1.00e+0	0.406	0.012
GOTERM_BP_FAT	spermatogenesis	0.0536	15	203	718	19401	0.0184	0.412	2	1.00e+0	0.406	0.00871
GOTERM_BP_FAT	immune response-activating cell surface receptor signaling pathway	0.0286	8	203	258	19401	0.0187	0.416	2.96	1.00e+0	0.41	0.00592
GOTERM_BP_FAT	negative regulation of immune system process	0.0464	13	203	581	19401	0.0189	0.417	2.14	1.00e+0	0.41	0.00835
GOTERM_BP_FAT	nephron development	0.0214	6	203	147	19401	0.019	0.417	3.9	1.00e+0	0.41	0.00455
GOTERM_BP_FAT	kidney epithelium development	0.0214	6	203	148	19401	0.0194	0.425	3.87	1.00e+0	0.418	0.0047
GOTERM_BP_FAT	developmental process involved in reproduction	0.0714	20	203	1099	19401	0.021	0.442	1.74	1.00e+0	0.435	0.0114
GOTERM_BP_FAT	reproductive process	0.0964	27	203	1643	19401	0.021	0.442	1.57	1.00e+0	0.435	0.0128
GOTERM_BP_FAT	positive regulation of lymphocyte proliferation	0.0214	6	203	151	19401	0.021	0.442	3.8	1.00e+0	0.435	0.00518
GOTERM_BP_FAT	male gamete generation	0.0536	15	203	735	19401	0.022	0.453	1.95	1.00e+0	0.446	0.0106
GOTERM_BP_FAT	defense response to symbiont	0.0643	18	203	955	19401	0.0221	0.453	1.8	1.00e+0	0.446	0.0116
GOTERM_BP_FAT	regulation of mononuclear cell migration	0.0214	6	203	153	19401	0.0221	0.453	3.75	1.00e+0	0.446	0.00552
GOTERM_BP_FAT	multicellular organismal-level homeostasis	0.05	14	203	665	19401	0.0223	0.453	2.01	1.00e+0	0.446	0.0104
GOTERM_BP_FAT	epithelial cell differentiation	0.05	14	203	665	19401	0.0223	0.453	2.01	1.00e+0	0.446	0.0104
GOTERM_BP_FAT	positive regulation of cytokine production	0.0429	12	203	527	19401	0.0225	0.453	2.18	1.00e+0	0.446	0.00976
GOTERM_BP_FAT	leukocyte chemotaxis	0.0214	6	203	154	19401	0.0227	0.453	3.72	1.00e+0	0.446	0.00569
GOTERM_BP_FAT	positive regulation of mononuclear cell proliferation	0.0214	6	203	154	19401	0.0227	0.453	3.72	1.00e+0	0.446	0.00569
GOTERM_BP_FAT	regulation of hormone secretion	0.0286	8	203	270	19401	0.0233	0.458	2.83	1.00e+0	0.451	0.00771
GOTERM_BP_FAT	cell migration	0.0643	18	203	961	19401	0.0233	0.458	1.79	1.00e+0	0.451	0.0123
GOTERM_BP_FAT	regulation of adaptive immune response based on somatic recombination of immune receptors built from immunoglobulin superfamily domains	0.025	7	203	211	19401	0.0234	0.458	3.17	1.00e+0	0.451	0.0069
GOTERM_BP_FAT	leukocyte mediated immunity	0.0321	9	203	333	19401	0.0237	0.458	2.58	1.00e+0	0.451	0.00861
GOTERM_BP_FAT	regulation of peptide hormone secretion	0.025	7	203	212	19401	0.0238	0.458	3.16	1.00e+0	0.451	0.00707
GOTERM_BP_FAT	germ cell development	0.0357	10	203	398	19401	0.0239	0.458	2.4	1.00e+0	0.451	0.00937
GOTERM_BP_FAT	negative regulation of multicellular organismal process	0.0786	22	203	1273	19401	0.0247	0.472	1.65	1.00e+0	0.464	0.0142
GOTERM_BP_FAT	positive regulation of cell activation	0.0357	10	203	400	19401	0.0249	0.472	2.39	1.00e+0	0.464	0.00975
GOTERM_BP_FAT	regulation of peptide secretion	0.025	7	203	215	19401	0.0254	0.479	3.11	1.00e+0	0.472	0.00763
GOTERM_BP_FAT	intracellular chemical homeostasis	0.0464	13	203	608	19401	0.0258	0.484	2.04	1.00e+0	0.476	0.0119
GOTERM_BP_FAT	regulation of peptide transport	0.025	7	203	217	19401	0.0263	0.491	3.08	1.00e+0	0.483	0.00799
GOTERM_BP_FAT	negative regulation of developmental process	0.0679	19	203	1053	19401	0.0269	0.496	1.72	1.00e+0	0.488	0.0147
GOTERM_BP_FAT	leukocyte activation involved in immune response	0.025	7	203	218	19401	0.0269	0.496	3.07	1.00e+0	0.488	0.00818
GOTERM_BP_FAT	regulation of phagocytosis	0.0179	5	203	109	19401	0.0272	0.5	4.38	1.00e+0	0.492	0.00579
GOTERM_BP_FAT	gamete generation	0.0607	17	203	906	19401	0.0277	0.5	1.79	1.00e+0	0.492	0.0146
GOTERM_BP_FAT	negative regulation of immune response	0.025	7	203	219	19401	0.0277	0.5	3.05	1.00e+0	0.492	0.00842
GOTERM_BP_FAT	cell chemotaxis	0.025	7	203	220	19401	0.0279	0.5	3.04	1.00e+0	0.492	0.00858
GOTERM_BP_FAT	inorganic anion transport	0.0214	6	203	163	19401	0.0281	0.502	3.52	1.00e+0	0.493	0.00746
GOTERM_BP_FAT	regulation of protein secretion	0.0286	8	203	282	19401	0.0286	0.507	2.71	1.00e+0	0.499	0.00988
GOTERM_BP_FAT	phagocytosis	0.0214	6	203	164	19401	0.0287	0.507	3.5	1.00e+0	0.499	0.00768
GOTERM_BP_FAT	signal transduction	0.2357	66	203	5047	19401	0.0289	0.507	1.25	1.00e+0	0.499	0.0224
GOTERM_BP_FAT	cell activation involved in immune response	0.025	7	203	222	19401	0.029	0.507	3.01	1.00e+0	0.499	0.009
GOTERM_BP_FAT	response to endogenous stimulus	0.0786	22	203	1296	19401	0.0293	0.509	1.62	1.00e+0	0.501	0.0171
GOTERM_BP_FAT	response to lipopolysaccharide	0.0321	9	203	347	19401	0.0294	0.509	2.48	1.00e+0	0.501	0.0111
GOTERM_BP_FAT	positive regulation of tumor necrosis factor production	0.0179	5	203	112	19401	0.0297	0.511	4.27	1.00e+0	0.503	0.00649
GOTERM_BP_FAT	microtubule-based transport	0.025	7	203	224	19401	0.0303	0.515	2.99	1.00e+0	0.507	0.00946
GOTERM_BP_FAT	regulation of leukocyte differentiation	0.0321	9	203	350	19401	0.0307	0.515	2.46	1.00e+0	0.507	0.0117
GOTERM_BP_FAT	positive regulation of inflammatory response	0.0214	6	203	167	19401	0.0307	0.515	3.43	1.00e+0	0.507	0.00832
GOTERM_BP_FAT	activation of immune response	0.0357	10	203	417	19401	0.031	0.515	2.29	1.00e+0	0.507	0.0128
GOTERM_BP_FAT	regulation of adaptive immune response	0.025	7	203	226	19401	0.0313	0.515	2.96	1.00e+0	0.507	0.00986
GOTERM_BP_FAT	microtubule-based process	0.0607	17	203	920	19401	0.0313	0.515	1.77	1.00e+0	0.507	0.0167
GOTERM_BP_FAT	response to alcohol	0.0286	8	203	288	19401	0.0318	0.519	2.65	1.00e+0	0.51	0.0111
GOTERM_BP_FAT	negative regulation of cell development	0.0286	8	203	289	19401	0.0322	0.521	2.65	1.00e+0	0.512	0.0113
GOTERM_BP_FAT	regulation of interleukin-1 beta production	0.0179	5	203	115	19401	0.0323	0.521	4.16	1.00e+0	0.512	0.00724
GOTERM_BP_FAT	nephron epithelium development	0.0179	5	203	116	19401	0.0332	0.53	4.12	1.00e+0	0.521	0.0075
GOTERM_BP_FAT	positive regulation of tumor necrosis factor superfamily cytokine production	0.0179	5	203	116	19401	0.0332	0.53	4.12	1.00e+0	0.521	0.0075
GOTERM_BP_FAT	regulation of myeloid cell differentiation	0.025	7	203	231	19401	0.0342	0.536	2.9	1.00e+0	0.528	0.011
GOTERM_BP_FAT	cellular process involved in reproduction in multicellular organism	0.0357	10	203	433	19401	0.0382	0.597	2.21	1.00e+0	0.587	0.0161
GOTERM_BP_FAT	negative regulation of growth	0.025	7	203	238	19401	0.0387	0.597	2.81	1.00e+0	0.587	0.0128
GOTERM_BP_FAT	enzyme-linked receptor protein signaling pathway	0.0464	13	203	649	19401	0.0395	0.603	1.91	1.00e+0	0.593	0.0194
GOTERM_BP_FAT	regulation of epithelial cell differentiation	0.0214	6	203	179	19401	0.0395	0.603	3.2	1.00e+0	0.593	0.0115
GOTERM_BP_FAT	negative regulation of leukocyte differentiation	0.0179	5	203	124	19401	0.0408	0.609	3.85	1.00e+0	0.599	0.00986
GOTERM_BP_FAT	regulation of ERK1 and ERK2 cascade	0.0286	8	203	305	19401	0.0411	0.609	2.51	1.00e+0	0.599	0.0152
GOTERM_BP_FAT	negative regulation of secretion	0.0214	6	203	181	19401	0.0412	0.609	3.17	1.00e+0	0.599	0.0121
GOTERM_BP_FAT	epithelial cell proliferation	0.0214	6	203	183	19401	0.0429	0.631	3.13	1.00e+0	0.621	0.0127
GOTERM_BP_FAT	cell communication	0.2464	69	203	5433	19401	0.0443	0.647	1.21	1.00e+0	0.636	0.0353
GOTERM_BP_FAT	regulation of hemopoiesis	0.0357	10	203	448	19401	0.0452	0.652	2.13	1.00e+0	0.642	0.0198
GOTERM_BP_FAT	blood circulation	0.0357	10	203	448	19401	0.0452	0.652	2.13	1.00e+0	0.642	0.0198
GOTERM_BP_FAT	regulation of response to stress	0.0857	24	203	1521	19401	0.0453	0.652	1.51	1.00e+0	0.642	0.0284
GOTERM_BP_FAT	positive regulation of transport	0.0571	16	203	890	19401	0.0458	0.654	1.72	1.00e+0	0.644	0.025
GOTERM_BP_FAT	cell projection organization	0.075	21	203	1282	19401	0.046	0.654	1.57	1.00e+0	0.644	0.0277
GOTERM_BP_FAT	regulation of BMP signaling pathway	0.0179	5	203	129	19401	0.046	0.654	3.7	1.00e+0	0.644	0.0116
GOTERM_BP_FAT	regulation of cell differentiation	0.0929	26	203	1691	19401	0.0471	0.667	1.47	1.00e+0	0.656	0.0304
GOTERM_BP_FAT	regulation of regulated secretory pathway	0.0179	5	203	131	19401	0.0482	0.671	3.65	1.00e+0	0.66	0.0123
GOTERM_BP_FAT	negative regulation of hemopoiesis	0.0179	5	203	131	19401	0.0482	0.671	3.65	1.00e+0	0.66	0.0123
GOTERM_BP_FAT	kidney development	0.0286	8	203	317	19401	0.0488	0.671	2.41	1.00e+0	0.66	0.0188
GOTERM_BP_FAT	regulation of exocytosis	0.0214	6	203	192	19401	0.0507	0.692	2.99	1.00e+0	0.681	0.0158
GOTERM_BP_FAT	signaling	0.2429	68	203	5385	19401	0.0515	0.694	1.21	1.00e+0	0.683	0.0412
GOTERM_BP_FAT	regulation of endocytosis	0.0286	8	203	323	19401	0.0525	0.705	2.37	1.00e+0	0.693	0.0207
GOTERM_BP_FAT	regulation of sequestering of calcium ion	0.0179	5	203	137	19401	0.0551	0.731	3.49	1.00e+0	0.719	0.0147
GOTERM_BP_FAT	regulation of interleukin-1 production	0.0179	5	203	137	19401	0.0551	0.731	3.49	1.00e+0	0.719	0.0147
GOTERM_BP_FAT	regulation of B cell activation	0.0179	5	203	137	19401	0.0551	0.731	3.49	1.00e+0	0.719	0.0147
GOTERM_BP_FAT	renal system development	0.0286	8	203	328	19401	0.0564	0.739	2.33	1.00e+0	0.727	0.0225
GOTERM_BP_FAT	negative regulation of immune effector process	0.0179	5	203	139	19401	0.0576	0.747	3.44	1.00e+0	0.735	0.0155
GOTERM_BP_FAT	regulation of MAPK cascade	0.0464	13	203	690	19401	0.0577	0.747	1.8	1.00e+0	0.735	0.0299
GOTERM_BP_FAT	regulation of leukocyte cell-cell adhesion	0.0321	9	203	402	19401	0.0598	0.766	2.14	1.00e+0	0.753	0.026
GOTERM_BP_FAT	regulation of biological quality	0.1536	43	203	3194	19401	0.0611	0.77	1.29	1.00e+0	0.758	0.0454
GOTERM_BP_FAT	regulation of T cell activation	0.0321	9	203	404	19401	0.0614	0.771	2.13	1.00e+0	0.759	0.0268
GOTERM_BP_FAT	cell maturation	0.0214	6	203	204	19401	0.0627	0.784	2.81	1.00e+0	0.771	0.0206
GOTERM_BP_FAT	positive regulation of MAPK cascade	0.0357	10	203	484	19401	0.0671	0.829	1.97	1.00e+0	0.815	0.0316
GOTERM_BP_FAT	positive regulation of cell population proliferation	0.0607	17	203	1021	19401	0.0677	0.829	1.59	1.00e+0	0.815	0.0398
GOTERM_BP_FAT	lymphocyte mediated immunity	0.025	7	203	276	19401	0.0694	0.839	2.42	1.00e+0	0.825	0.0265
GOTERM_BP_FAT	positive regulation of lymphocyte activation	0.0286	8	203	345	19401	0.0698	0.839	2.22	1.00e+0	0.825	0.0293
GOTERM_BP_FAT	regulation of hormone levels	0.0393	11	203	565	19401	0.072	0.85	1.86	1.00e+0	0.836	0.0361
GOTERM_BP_FAT	cellular homeostasis	0.0464	13	203	720	19401	0.0741	0.866	1.73	1.00e+0	0.852	0.04
GOTERM_BP_FAT	positive regulation of immune effector process	0.025	7	203	281	19401	0.0741	0.866	2.38	1.00e+0	0.852	0.0288
GOTERM_BP_FAT	innate immune response-activating signaling pathway	0.0179	5	203	152	19401	0.0747	0.87	3.14	1.00e+0	0.856	0.022
GOTERM_BP_FAT	defense response to bacterium	0.0286	8	203	351	19401	0.0752	0.87	2.18	1.00e+0	0.856	0.0319
GOTERM_BP_FAT	lymphocyte activation involved in immune response	0.0179	5	203	154	19401	0.0776	0.887	3.1	1.00e+0	0.873	0.0231
GOTERM_BP_FAT	vascular process in circulatory system	0.025	7	203	288	19401	0.0821	0.92	2.32	1.00e+0	0.905	0.0323
GOTERM_BP_FAT	positive regulation of cell communication	0.0964	27	203	1884	19401	0.0838	0.93	1.37	1.00e+0	0.915	0.0576
GOTERM_BP_FAT	negative regulation of molecular function	0.0393	11	203	582	19401	0.0838	0.93	1.81	1.00e+0	0.915	0.0427
GOTERM_BP_FAT	negative regulation of secretion by cell	0.0179	5	203	159	19401	0.0849	0.936	3.01	1.00e+0	0.921	0.0261
GOTERM_BP_FAT	MAPK cascade	0.0214	6	203	225	19401	0.0863	0.942	2.55	1.00e+0	0.927	0.0313
GOTERM_BP_FAT	regulation of chemotaxis	0.0214	6	203	225	19401	0.0863	0.942	2.55	1.00e+0	0.927	0.0313
GOTERM_BP_FAT	response to lipid	0.0536	15	203	900	19401	0.0879	0.953	1.59	1.00e+0	0.938	0.0513
GOTERM_BP_FAT	plasma membrane bounded cell projection organization	0.0679	19	203	1225	19401	0.0884	0.953	1.48	1.00e+0	0.938	0.0557
GOTERM_BP_FAT	regulation of reactive oxygen species metabolic process	0.0179	5	203	161	19401	0.0886	0.953	2.97	1.00e+0	0.938	0.0274
GOTERM_BP_FAT	positive regulation of apoptotic process	0.0393	11	203	590	19401	0.0896	0.953	1.78	1.00e+0	0.938	0.0465
GOTERM_BP_FAT	response to ketone	0.0214	6	203	228	19401	0.0904	0.955	2.52	1.00e+0	0.939	0.0331
GOTERM_BP_FAT	regulation of response to biotic stimulus	0.0393	11	203	592	19401	0.0912	0.955	1.78	1.00e+0	0.94	0.0475
GOTERM_BP_FAT	metal ion transport	0.0429	12	203	669	19401	0.0913	0.955	1.71	1.00e+0	0.94	0.0493
GOTERM_BP_FAT	regulation of molecular function	0.0786	22	203	1482	19401	0.0925	0.961	1.42	1.00e+0	0.945	0.061
GOTERM_BP_FAT	cellular response to endogenous stimulus	0.0571	16	203	994	19401	0.0961	0.991	1.54	1.00e+0	0.975	0.0581
GOTERM_BP_FAT	regulation of cell population proliferation	0.0929	26	203	1830	19401	0.097	0.994	1.36	1.00e+0	0.978	0.0671
GOTERM_BP_FAT	positive regulation of cytosolic calcium ion concentration	0.0179	5	203	168	19401	0.0987	0.996	2.84	1.00e+0	0.979	0.032
GOTERM_BP_FAT	negative regulation of catabolic process	0.0286	8	203	376	19401	0.0988	0.996	2.03	1.00e+0	0.979	0.0448
GOTERM_BP_FAT	calcium ion homeostasis	0.0214	6	203	235	19401	0.0996	0.996	2.44	1.00e+0	0.979	0.0375

## Sheet: CervicalArmvsNoArm
Cervical: Arm vs. No-arm (bulbar+leg) onset
Category	Term	Genes	Count	List Total	Pop Hits	Pop Total	P-Value	Benjamini	Fold Enrichment	Bonferroni	FDR	Fisher Exact
GOTERM_BP_FAT	response to stress	0.2489	55	148	3689	19401	3.38e-07	0.00107	1.95	0.00107	0.00105	1.7e-07
GOTERM_BP_FAT	regulation of multicellular organismal development	0.1357	30	148	1538	19401	3.91e-06	0.00583	2.56	0.0123	0.0057	1.49e-06
GOTERM_BP_FAT	signal transduction	0.2896	64	148	5047	19401	6.48e-06	0.00583	1.66	0.0203	0.0057	3.83e-06
GOTERM_BP_FAT	defense response	0.1357	30	148	1589	19401	7.37e-06	0.00583	2.47	0.023	0.0057	2.9e-06
GOTERM_BP_FAT	inorganic ion homeostasis	0.0679	15	148	455	19401	9.71e-06	0.00614	4.32	0.0302	0.00601	2.16e-06
GOTERM_BP_FAT	signaling	0.2986	66	148	5385	19401	1.33e-05	0.00636	1.61	0.0412	0.00623	8.14e-06
GOTERM_BP_FAT	stress response to metal ion	0.0226	5	148	21	19401	1.71e-05	0.00636	31.21	0.0527	0.00623	4.45e-07
GOTERM_BP_FAT	regulation of immune system process	0.1403	31	148	1752	19401	1.73e-05	0.00636	2.32	0.0532	0.00623	7.26e-06
GOTERM_BP_FAT	cell communication	0.2986	66	148	5433	19401	1.81e-05	0.00636	1.59	0.0557	0.00623	1.12e-05
GOTERM_BP_FAT	detoxification of inorganic compound	0.0226	5	148	23	19401	2.5e-05	0.00792	28.5	0.0761	0.00775	7.27e-07
GOTERM_BP_FAT	homeostatic process	0.1267	28	148	1543	19401	3.39e-05	0.00975	2.38	0.102	0.00954	1.39e-05
GOTERM_BP_FAT	regulation of leukocyte mediated immunity	0.0498	11	148	270	19401	4.11e-05	0.0101	5.34	0.122	0.00989	7.35e-06
GOTERM_BP_FAT	cellular response to cadmium ion	0.0226	5	148	26	19401	4.15e-05	0.0101	25.21	0.123	0.00989	1.4e-06
GOTERM_BP_FAT	response to cadmium ion	0.0271	6	148	52	19401	4.55e-05	0.0103	15.13	0.134	0.0101	2.71e-06
GOTERM_BP_FAT	regulation of cell differentiation	0.1312	29	148	1691	19401	6.31e-05	0.0128	2.25	0.181	0.0125	2.73e-05
GOTERM_BP_FAT	response to cytokine	0.0905	20	148	916	19401	6.47e-05	0.0128	2.86	0.185	0.0125	2.19e-05
GOTERM_BP_FAT	response to peptide	0.0905	20	148	932	19401	8.14e-05	0.0151	2.81	0.227	0.0148	2.8e-05
GOTERM_BP_FAT	immune system process	0.1674	37	148	2511	19401	9.8e-05	0.0172	1.93	0.266	0.0168	4.94e-05
GOTERM_BP_FAT	chemical homeostasis	0.0905	20	148	969	19401	0.000135	0.0218	2.71	0.348	0.0213	4.83e-05
GOTERM_BP_FAT	intracellular zinc ion homeostasis	0.0226	5	148	35	19401	0.000138	0.0218	18.73	0.354	0.0213	6.52e-06
GOTERM_BP_FAT	cellular response to cytokine stimulus	0.0814	18	148	815	19401	0.000151	0.0227	2.9	0.379	0.0222	5.03e-05
GOTERM_BP_FAT	response to copper ion	0.0226	5	148	37	19401	0.000172	0.0232	17.71	0.419	0.0228	8.64e-06
GOTERM_BP_FAT	cell adhesion	0.0905	20	148	989	19401	0.000176	0.0232	2.65	0.426	0.0228	6.41e-05
GOTERM_BP_FAT	regulation of phosphorus metabolic process	0.0814	18	148	828	19401	0.000182	0.0232	2.85	0.437	0.0228	6.16e-05
GOTERM_BP_FAT	monoatomic cation homeostasis	0.0633	14	148	526	19401	0.000188	0.0232	3.49	0.448	0.0228	5.17e-05
GOTERM_BP_FAT	regulation of immune response	0.095	21	148	1080	19401	0.000191	0.0232	2.55	0.454	0.0228	7.25e-05
GOTERM_BP_FAT	monoatomic ion homeostasis	0.0633	14	148	538	19401	0.000234	0.0255	3.41	0.522	0.0249	6.59e-05
GOTERM_BP_FAT	cell activation	0.0769	17	148	784	19401	0.000304	0.032	2.84	0.617	0.0313	0.000103
GOTERM_BP_FAT	response to oxygen-containing compound	0.1222	27	148	1677	19401	0.000341	0.0339	2.11	0.66	0.0332	0.000157
GOTERM_BP_FAT	positive regulation of multicellular organismal process	0.1267	28	148	1773	19401	0.000343	0.0339	2.07	0.662	0.0332	0.000161
GOTERM_BP_FAT	response to external stimulus	0.1403	31	148	2072	19401	0.000363	0.0348	1.96	0.682	0.034	0.00018
GOTERM_BP_FAT	regulation of immune effector process	0.0543	12	148	427	19401	0.000419	0.0383	3.68	0.734	0.0375	0.000109
GOTERM_BP_FAT	immune response-regulating cell surface receptor signaling pathway	0.0452	10	148	295	19401	0.000424	0.0383	4.44	0.739	0.0375	9.12e-05
GOTERM_BP_FAT	regulation of phosphate metabolic process	0.0769	17	148	827	19401	0.000545	0.0468	2.69	0.822	0.0458	0.000195
GOTERM_BP_FAT	intracellular monoatomic cation homeostasis	0.0543	12	148	441	19401	0.000548	0.0468	3.57	0.823	0.0458	0.000147
GOTERM_BP_FAT	phospholipase C-activating G protein-coupled receptor signaling pathway	0.0317	7	148	135	19401	0.000575	0.0478	6.8	0.837	0.0468	8e-05
GOTERM_BP_FAT	immune response	0.1267	28	148	1839	19401	0.000607	0.0492	2	0.854	0.0482	0.000295
GOTERM_BP_FAT	intracellular monoatomic ion homeostasis	0.0543	12	148	450	19401	0.000648	0.0512	3.5	0.871	0.0501	0.000178
GOTERM_BP_FAT	intracellular chemical homeostasis	0.0633	14	148	608	19401	0.000742	0.0558	3.02	0.904	0.0546	0.000236
GOTERM_BP_FAT	cellular response to chemical stimulus	0.1357	30	148	2066	19401	0.000766	0.0558	1.9	0.911	0.0546	0.00039
GOTERM_BP_FAT	inflammatory response	0.0633	14	148	611	19401	0.000777	0.0558	3	0.914	0.0546	0.000248
GOTERM_BP_FAT	circulatory system process	0.0588	13	148	538	19401	0.000826	0.058	3.17	0.927	0.0568	0.00025
GOTERM_BP_FAT	regulation of lymphocyte mediated immunity	0.0362	8	148	208	19401	0.00106	0.0711	5.04	0.965	0.0696	0.000199
GOTERM_BP_FAT	intracellular signal transduction	0.1222	27	148	1818	19401	0.00114	0.0751	1.95	0.973	0.0735	0.000568
GOTERM_BP_FAT	cellular homeostasis	0.0679	15	148	720	19401	0.00116	0.0751	2.73	0.975	0.0735	0.000409
GOTERM_BP_FAT	regulation of natural killer cell mediated immunity	0.0226	5	148	62	19401	0.00126	0.0793	10.57	0.981	0.0777	0.00011
GOTERM_BP_FAT	positive regulation of immune system process	0.086	19	148	1083	19401	0.00142	0.0868	2.3	0.989	0.0849	0.000594
GOTERM_BP_FAT	negative regulation of programmed cell death	0.0814	18	148	994	19401	0.00143	0.0868	2.37	0.989	0.0849	0.000578
GOTERM_BP_FAT	positive regulation of gene expression	0.095	21	148	1270	19401	0.00147	0.0877	2.17	0.99	0.0858	0.000653
GOTERM_BP_FAT	positive regulation of leukocyte mediated immunity	0.0317	7	148	163	19401	0.00153	0.088	5.63	0.992	0.0862	0.000258
GOTERM_BP_FAT	regulation of programmed cell death	0.1131	25	148	1659	19401	0.00155	0.088	1.98	0.993	0.0862	0.000758
GOTERM_BP_FAT	regulation of cytokine production	0.0769	17	148	914	19401	0.00156	0.088	2.44	0.993	0.0862	0.000615
GOTERM_BP_FAT	regulation of defense response	0.0769	17	148	916	19401	0.0016	0.0885	2.43	0.994	0.0866	0.00063
GOTERM_BP_FAT	immune response-regulating signaling pathway	0.0498	11	148	432	19401	0.00171	0.0931	3.34	0.996	0.0911	0.000489
GOTERM_BP_FAT	cell surface receptor signaling pathway	0.1357	30	148	2182	19401	0.00179	0.0961	1.8	0.997	0.094	0.000962
GOTERM_BP_FAT	innate immune response	0.0724	16	148	844	19401	0.00189	0.0997	2.49	0.997	0.0975	0.00073
GOTERM_BP_FAT	positive regulation of cell differentiation	0.0769	17	148	940	19401	0.00207	0.107	2.37	0.999	0.105	0.000839
GOTERM_BP_FAT	blood circulation	0.0498	11	148	448	19401	0.00223	0.111	3.22	0.999	0.109	0.000661
GOTERM_BP_FAT	regulation of hemopoiesis	0.0498	11	148	448	19401	0.00223	0.111	3.22	0.999	0.109	0.000661
GOTERM_BP_FAT	lymphocyte activation	0.0543	12	148	526	19401	0.00225	0.111	2.99	0.999	0.109	0.000721
GOTERM_BP_FAT	positive regulation of cytokine production	0.0543	12	148	527	19401	0.00229	0.111	2.98	0.999	0.109	0.000733
GOTERM_BP_FAT	regulation of apoptotic process	0.1086	24	148	1612	19401	0.00234	0.112	1.95	0.999	0.11	0.00116
GOTERM_BP_FAT	defense response to symbiont	0.0769	17	148	955	19401	0.00243	0.113	2.33	1.00e+0	0.111	0.000998
GOTERM_BP_FAT	negative regulation of apoptotic process	0.0769	17	148	958	19401	0.0025	0.113	2.33	1.00e+0	0.111	0.00103
GOTERM_BP_FAT	negative regulation of leukocyte differentiation	0.0271	6	148	124	19401	0.00255	0.113	6.34	1.00e+0	0.111	0.00038
GOTERM_BP_FAT	cell migration	0.0769	17	148	961	19401	0.00258	0.113	2.32	1.00e+0	0.111	0.00107
GOTERM_BP_FAT	negative regulation of developmental process	0.0814	18	148	1053	19401	0.00262	0.113	2.24	1.00e+0	0.111	0.00112
GOTERM_BP_FAT	regulation of carbohydrate metabolic process	0.0317	7	148	185	19401	0.00289	0.123	4.96	1.00e+0	0.121	0.000553
GOTERM_BP_FAT	regulation of cytokine production involved in immune response	0.0271	6	148	129	19401	0.00303	0.126	6.1	1.00e+0	0.123	0.000469
GOTERM_BP_FAT	negative regulation of hemopoiesis	0.0271	6	148	131	19401	0.00323	0.133	6	1.00e+0	0.13	0.000509
GOTERM_BP_FAT	negative regulation of nucleobase-containing compound metabolic process	0.1041	23	148	1556	19401	0.00327	0.133	1.94	1.00e+0	0.13	0.00162
GOTERM_BP_FAT	actin filament-based process	0.0588	13	148	639	19401	0.00347	0.139	2.67	1.00e+0	0.136	0.00124
GOTERM_BP_FAT	negative regulation of multicellular organismal process	0.0905	20	148	1273	19401	0.00352	0.139	2.06	1.00e+0	0.136	0.00164
GOTERM_BP_FAT	response to biotic stimulus	0.1041	23	148	1580	19401	0.00393	0.153	1.91	1.00e+0	0.15	0.00198
GOTERM_BP_FAT	leukocyte activation	0.0588	13	148	652	19401	0.00407	0.157	2.61	1.00e+0	0.154	0.00149
GOTERM_BP_FAT	regulation of response to external stimulus	0.086	19	148	1198	19401	0.0042	0.16	2.08	1.00e+0	0.157	0.00194
GOTERM_BP_FAT	positive regulation of response to stimulus	0.1403	31	148	2426	19401	0.0044	0.164	1.68	1.00e+0	0.161	0.00253
GOTERM_BP_FAT	positive regulation of lymphocyte mediated immunity	0.0271	6	148	141	19401	0.00441	0.164	5.58	1.00e+0	0.161	0.00075
GOTERM_BP_FAT	regulation of production of molecular mediator of immune response	0.0317	7	148	203	19401	0.00455	0.167	4.52	1.00e+0	0.164	0.000955
GOTERM_BP_FAT	positive regulation of biosynthetic process	0.1538	34	148	2767	19401	0.00482	0.175	1.61	1.00e+0	0.172	0.00289
GOTERM_BP_FAT	regulation of response to stress	0.0995	22	148	1521	19401	0.00533	0.192	1.9	1.00e+0	0.187	0.0027
GOTERM_BP_FAT	negative regulation of RNA metabolic process	0.095	21	148	1423	19401	0.00539	0.192	1.93	1.00e+0	0.188	0.00267
GOTERM_BP_FAT	positive regulation of immune effector process	0.0362	8	148	281	19401	0.00566	0.197	3.73	1.00e+0	0.192	0.00144
GOTERM_BP_FAT	positive regulation of developmental process	0.095	21	148	1437	19401	0.006	0.206	1.92	1.00e+0	0.202	0.003
GOTERM_BP_FAT	detoxification	0.0271	6	148	152	19401	0.00607	0.206	5.17	1.00e+0	0.202	0.00111
GOTERM_BP_FAT	leukocyte differentiation	0.0452	10	148	437	19401	0.00616	0.207	3	1.00e+0	0.203	0.00195
GOTERM_BP_FAT	regulation of leukocyte apoptotic process	0.0226	5	148	97	19401	0.00636	0.212	6.76	1.00e+0	0.207	0.000886
GOTERM_BP_FAT	negative regulation of transcription by RNA polymerase II	0.0724	16	148	964	19401	0.0065	0.213	2.18	1.00e+0	0.208	0.00285
GOTERM_BP_FAT	negative regulation of cell development	0.0362	8	148	289	19401	0.00657	0.213	3.63	1.00e+0	0.208	0.00172
GOTERM_BP_FAT	regulation of cell development	0.0679	15	148	874	19401	0.00665	0.213	2.25	1.00e+0	0.208	0.00282
GOTERM_BP_FAT	lymphocyte differentiation	0.0362	8	148	290	19401	0.00669	0.213	3.62	1.00e+0	0.208	0.00176
GOTERM_BP_FAT	regulation of peptidyl-tyrosine phosphorylation	0.0271	6	148	156	19401	0.00674	0.213	5.04	1.00e+0	0.208	0.00127
GOTERM_BP_FAT	negative regulation of catalytic activity	0.0362	8	148	292	19401	0.00694	0.217	3.59	1.00e+0	0.212	0.00183
GOTERM_BP_FAT	mononuclear cell differentiation	0.0407	9	148	372	19401	0.00753	0.233	3.17	1.00e+0	0.228	0.00225
GOTERM_BP_FAT	regulation of biological quality	0.1674	37	148	3194	19401	0.00786	0.241	1.52	1.00e+0	0.236	0.005
GOTERM_BP_FAT	positive regulation of macromolecule biosynthetic process	0.1448	32	148	2642	19401	0.00808	0.242	1.59	1.00e+0	0.237	0.0049
GOTERM_BP_FAT	muscle system process	0.0362	8	148	301	19401	0.00813	0.242	3.48	1.00e+0	0.237	0.00221
GOTERM_BP_FAT	hemopoiesis	0.0588	13	148	715	19401	0.00829	0.243	2.38	1.00e+0	0.238	0.00331
GOTERM_BP_FAT	regulation of myeloid cell differentiation	0.0317	7	148	231	19401	0.0084	0.243	3.97	1.00e+0	0.238	0.002
GOTERM_BP_FAT	positive regulation of immune response	0.0588	13	148	717	19401	0.00847	0.243	2.38	1.00e+0	0.238	0.00339
GOTERM_BP_FAT	cell motility	0.0814	18	148	1198	19401	0.00932	0.263	1.97	1.00e+0	0.257	0.00452
GOTERM_BP_FAT	muscle contraction	0.0317	7	148	238	19401	0.00965	0.268	3.86	1.00e+0	0.262	0.00237
GOTERM_BP_FAT	negative regulation of growth	0.0317	7	148	238	19401	0.00965	0.268	3.86	1.00e+0	0.262	0.00237
GOTERM_BP_FAT	cell development	0.1312	29	148	2351	19401	0.00988	0.272	1.62	1.00e+0	0.266	0.00588
GOTERM_BP_FAT	anatomical structure formation involved in morphogenesis	0.0724	16	148	1014	19401	0.0101	0.272	2.07	1.00e+0	0.267	0.00465
GOTERM_BP_FAT	negative regulation of DNA-templated transcription	0.086	19	148	1308	19401	0.0101	0.272	1.9	1.00e+0	0.267	0.00508
GOTERM_BP_FAT	cellular response to nitrogen compound	0.0543	12	148	651	19401	0.0108	0.284	2.42	1.00e+0	0.278	0.00425
GOTERM_BP_FAT	negative regulation of RNA biosynthetic process	0.086	19	148	1318	19401	0.0109	0.285	1.89	1.00e+0	0.279	0.00551
GOTERM_BP_FAT	response to type II interferon	0.0226	5	148	114	19401	0.0111	0.286	5.75	1.00e+0	0.28	0.00182
GOTERM_BP_FAT	cell population proliferation	0.0588	13	148	748	19401	0.0116	0.294	2.28	1.00e+0	0.288	0.00483
GOTERM_BP_FAT	regulation of epithelial cell differentiation	0.0271	6	148	179	19401	0.0118	0.296	4.39	1.00e+0	0.29	0.00254
GOTERM_BP_FAT	response to other organism	0.095	21	148	1535	19401	0.012	0.296	1.79	1.00e+0	0.29	0.00639
GOTERM_BP_FAT	regulation of cell communication	0.1855	41	148	3744	19401	0.012	0.296	1.44	1.00e+0	0.29	0.00808
GOTERM_BP_FAT	response to external biotic stimulus	0.095	21	148	1538	19401	0.0122	0.3	1.79	1.00e+0	0.293	0.00653
GOTERM_BP_FAT	defense response to other organism	0.0769	17	148	1137	19401	0.0124	0.302	1.96	1.00e+0	0.296	0.00605
GOTERM_BP_FAT	tube development	0.0679	15	148	947	19401	0.0129	0.308	2.08	1.00e+0	0.302	0.0059
GOTERM_BP_FAT	cellular response to metal ion	0.0271	6	148	183	19401	0.013	0.308	4.3	1.00e+0	0.302	0.00285
GOTERM_BP_FAT	negative regulation of molecular function	0.0498	11	148	582	19401	0.0133	0.312	2.48	1.00e+0	0.306	0.00509
GOTERM_BP_FAT	monoatomic ion transport	0.0724	16	148	1048	19401	0.0133	0.312	2	1.00e+0	0.306	0.00635
GOTERM_BP_FAT	B cell differentiation	0.0226	5	148	121	19401	0.0136	0.314	5.42	1.00e+0	0.308	0.00236
GOTERM_BP_FAT	leukocyte mediated immunity	0.0362	8	148	333	19401	0.0136	0.314	3.15	1.00e+0	0.308	0.00409
GOTERM_BP_FAT	regulation of innate immune response	0.0452	10	148	499	19401	0.0139	0.318	2.63	1.00e+0	0.312	0.00501
GOTERM_BP_FAT	intracellular signaling cassette	0.0633	14	148	862	19401	0.0141	0.32	2.13	1.00e+0	0.313	0.00627
GOTERM_BP_FAT	response to toxic substance	0.0317	7	148	261	19401	0.0147	0.331	3.52	1.00e+0	0.324	0.00394
GOTERM_BP_FAT	monoatomic ion transmembrane transport	0.0633	14	148	871	19401	0.0152	0.335	2.11	1.00e+0	0.328	0.00685
GOTERM_BP_FAT	immune effector process	0.0452	10	148	512	19401	0.0162	0.348	2.56	1.00e+0	0.341	0.00598
GOTERM_BP_FAT	regulation of phosphorylation	0.0543	12	148	691	19401	0.0162	0.348	2.28	1.00e+0	0.341	0.00674
GOTERM_BP_FAT	response to carbohydrate	0.0271	6	148	196	19401	0.0169	0.357	4.01	1.00e+0	0.35	0.00397
GOTERM_BP_FAT	response to abiotic stimulus	0.0769	17	148	1179	19401	0.017	0.357	1.89	1.00e+0	0.35	0.00856
GOTERM_BP_FAT	negative regulation of phosphorus metabolic process	0.0317	7	148	270	19401	0.0171	0.357	3.4	1.00e+0	0.35	0.00474
GOTERM_BP_FAT	negative regulation of phosphate metabolic process	0.0317	7	148	270	19401	0.0171	0.357	3.4	1.00e+0	0.35	0.00474
GOTERM_BP_FAT	regulation of leukocyte differentiation	0.0362	8	148	350	19401	0.0174	0.359	3	1.00e+0	0.352	0.0055
GOTERM_BP_FAT	response to metal ion	0.0362	8	148	351	19401	0.0177	0.359	2.99	1.00e+0	0.352	0.00559
GOTERM_BP_FAT	positive regulation of metabolic process	0.181	40	148	3720	19401	0.0177	0.359	1.41	1.00e+0	0.352	0.0121
GOTERM_BP_FAT	B cell mediated immunity	0.0271	6	148	199	19401	0.0179	0.359	3.95	1.00e+0	0.352	0.00427
GOTERM_BP_FAT	T cell activation	0.0362	8	148	353	19401	0.0182	0.359	2.97	1.00e+0	0.352	0.00578
GOTERM_BP_FAT	chemotaxis	0.0362	8	148	353	19401	0.0182	0.359	2.97	1.00e+0	0.352	0.00578
GOTERM_BP_FAT	taxis	0.0362	8	148	355	19401	0.0187	0.367	2.95	1.00e+0	0.359	0.00597
GOTERM_BP_FAT	lymphocyte mediated immunity	0.0317	7	148	276	19401	0.0188	0.367	3.32	1.00e+0	0.359	0.00533
GOTERM_BP_FAT	regulation of signaling	0.181	40	148	3736	19401	0.0189	0.367	1.4	1.00e+0	0.359	0.013
GOTERM_BP_FAT	adaptive immune response based on somatic recombination of immune receptors built from immunoglobulin superfamily domains	0.0317	7	148	279	19401	0.0197	0.379	3.29	1.00e+0	0.371	0.00565
GOTERM_BP_FAT	response to nitrogen compound	0.0724	16	148	1100	19401	0.0198	0.379	1.91	1.00e+0	0.371	0.00987
GOTERM_BP_FAT	adaptive immune response	0.0543	12	148	719	19401	0.0211	0.396	2.19	1.00e+0	0.388	0.0091
GOTERM_BP_FAT	response to radiation	0.0407	9	148	449	19401	0.0212	0.397	2.63	1.00e+0	0.389	0.00763
GOTERM_BP_FAT	cytokine-mediated signaling pathway	0.0407	9	148	451	19401	0.0217	0.402	2.62	1.00e+0	0.393	0.00784
GOTERM_BP_FAT	response to organophosphorus	0.0226	5	148	140	19401	0.0219	0.403	4.68	1.00e+0	0.394	0.00442
GOTERM_BP_FAT	regulation of adaptive immune response based on somatic recombination of immune receptors built from immunoglobulin superfamily domains	0.0271	6	148	211	19401	0.0224	0.403	3.73	1.00e+0	0.394	0.00566
GOTERM_BP_FAT	vascular process in circulatory system	0.0317	7	148	288	19401	0.0226	0.403	3.19	1.00e+0	0.394	0.00669
GOTERM_BP_FAT	negative regulation of kinase activity	0.0226	5	148	142	19401	0.0229	0.403	4.62	1.00e+0	0.394	0.00469
GOTERM_BP_FAT	leukocyte proliferation	0.0226	5	148	142	19401	0.0229	0.403	4.62	1.00e+0	0.394	0.00469
GOTERM_BP_FAT	regulation of protein phosphorylation	0.0498	11	148	640	19401	0.024	0.417	2.25	1.00e+0	0.408	0.0101
GOTERM_BP_FAT	regulation of cell shape	0.0226	5	148	145	19401	0.0245	0.424	4.52	1.00e+0	0.415	0.00512
GOTERM_BP_FAT	leukocyte activation involved in immune response	0.0271	6	148	218	19401	0.0253	0.435	3.61	1.00e+0	0.426	0.00661
GOTERM_BP_FAT	locomotion	0.0362	8	148	379	19401	0.0256	0.436	2.77	1.00e+0	0.426	0.00871
GOTERM_BP_FAT	negative regulation of immune response	0.0271	6	148	219	19401	0.0258	0.436	3.59	1.00e+0	0.426	0.00675
GOTERM_BP_FAT	positive regulation of defense response	0.0407	9	148	466	19401	0.0258	0.436	2.53	1.00e+0	0.426	0.00959
GOTERM_BP_FAT	regulation of body fluid levels	0.0362	8	148	380	19401	0.0259	0.436	2.76	1.00e+0	0.426	0.00884
GOTERM_BP_FAT	regulation of intracellular signal transduction	0.1131	25	148	2105	19401	0.0271	0.45	1.56	1.00e+0	0.44	0.0166
GOTERM_BP_FAT	cell activation involved in immune response	0.0271	6	148	222	19401	0.0271	0.45	3.54	1.00e+0	0.44	0.0072
GOTERM_BP_FAT	cellular response to oxygen-containing compound	0.0724	16	148	1149	19401	0.0279	0.457	1.83	1.00e+0	0.447	0.0145
GOTERM_BP_FAT	negative regulation of cell differentiation	0.0543	12	148	754	19401	0.0285	0.461	2.09	1.00e+0	0.451	0.0129
GOTERM_BP_FAT	actin cytoskeleton organization	0.0452	10	148	567	19401	0.0289	0.461	2.31	1.00e+0	0.451	0.0118
GOTERM_BP_FAT	regulation of adaptive immune response	0.0271	6	148	226	19401	0.029	0.461	3.48	1.00e+0	0.451	0.00783
GOTERM_BP_FAT	lymphocyte activation involved in immune response	0.0226	5	148	154	19401	0.0298	0.467	4.26	1.00e+0	0.457	0.00658
GOTERM_BP_FAT	positive regulation of macromolecule metabolic process	0.1629	36	148	3394	19401	0.0313	0.485	1.39	1.00e+0	0.474	0.0216
GOTERM_BP_FAT	regulation of kinase activity	0.0362	8	148	396	19401	0.0314	0.485	2.65	1.00e+0	0.474	0.0111
GOTERM_BP_FAT	vasculature development	0.0452	10	148	577	19401	0.0318	0.485	2.27	1.00e+0	0.475	0.0132
GOTERM_BP_FAT	G protein-coupled receptor signaling pathway	0.0769	17	148	1273	19401	0.0319	0.485	1.75	1.00e+0	0.475	0.0172
GOTERM_BP_FAT	negative regulation of immune system process	0.0452	10	148	581	19401	0.033	0.499	2.26	1.00e+0	0.489	0.0138
GOTERM_BP_FAT	biological process involved in interspecies interaction between organisms	0.095	21	148	1707	19401	0.0333	0.501	1.61	1.00e+0	0.49	0.0196
GOTERM_BP_FAT	myeloid leukocyte activation	0.0226	5	148	162	19401	0.0349	0.52	4.05	1.00e+0	0.509	0.0081
GOTERM_BP_FAT	learning	0.0226	5	148	163	19401	0.0356	0.521	4.02	1.00e+0	0.51	0.00831
GOTERM_BP_FAT	positive regulation of phosphate metabolic process	0.0407	9	148	497	19401	0.0357	0.521	2.37	1.00e+0	0.51	0.0141
GOTERM_BP_FAT	positive regulation of phosphorus metabolic process	0.0407	9	148	497	19401	0.0357	0.521	2.37	1.00e+0	0.51	0.0141
GOTERM_BP_FAT	regulation of response to biotic stimulus	0.0452	10	148	592	19401	0.0365	0.527	2.21	1.00e+0	0.515	0.0155
GOTERM_BP_FAT	response to endogenous stimulus	0.0769	17	148	1296	19401	0.0367	0.527	1.72	1.00e+0	0.515	0.0201
GOTERM_BP_FAT	negative regulation of transferase activity	0.0226	5	148	165	19401	0.037	0.529	3.97	1.00e+0	0.518	0.00874
GOTERM_BP_FAT	inorganic cation transmembrane transport	0.0498	11	148	690	19401	0.0374	0.529	2.09	1.00e+0	0.518	0.0168
GOTERM_BP_FAT	activation of immune response	0.0362	8	148	417	19401	0.0398	0.554	2.51	1.00e+0	0.542	0.0148
GOTERM_BP_FAT	response to light stimulus	0.0317	7	148	331	19401	0.0405	0.559	2.77	1.00e+0	0.547	0.0137
GOTERM_BP_FAT	monoatomic cation transmembrane transport	0.0498	11	148	705	19401	0.0422	0.578	2.05	1.00e+0	0.565	0.0194
GOTERM_BP_FAT	tissue development	0.0995	22	148	1870	19401	0.0435	0.583	1.54	1.00e+0	0.57	0.0267
GOTERM_BP_FAT	immune system development	0.0226	5	148	174	19401	0.0435	0.583	3.77	1.00e+0	0.57	0.0108
GOTERM_BP_FAT	cellular response to nutrient levels	0.0271	6	148	254	19401	0.0443	0.583	3.1	1.00e+0	0.57	0.0134
GOTERM_BP_FAT	cellular response to abiotic stimulus	0.0317	7	148	341	19401	0.0456	0.591	2.69	1.00e+0	0.579	0.0159
GOTERM_BP_FAT	cellular response to environmental stimulus	0.0317	7	148	341	19401	0.0456	0.591	2.69	1.00e+0	0.579	0.0159
GOTERM_BP_FAT	immune response-activating signaling pathway	0.0317	7	148	342	19401	0.0462	0.596	2.68	1.00e+0	0.583	0.0161
GOTERM_BP_FAT	immune response-activating cell surface receptor signaling pathway	0.0271	6	148	258	19401	0.0468	0.598	3.05	1.00e+0	0.585	0.0144
GOTERM_BP_FAT	negative regulation of response to stimulus	0.0995	22	148	1886	19401	0.0469	0.598	1.53	1.00e+0	0.585	0.0291
GOTERM_BP_FAT	positive regulation of establishment of protein localization	0.0317	7	148	345	19401	0.0478	0.602	2.66	1.00e+0	0.589	0.0168
GOTERM_BP_FAT	regulation of signal transduction	0.1538	34	148	3276	19401	0.0486	0.61	1.36	1.00e+0	0.597	0.0341
GOTERM_BP_FAT	regulation of small molecule metabolic process	0.0317	7	148	349	19401	0.0501	0.623	2.63	1.00e+0	0.609	0.0178
GOTERM_BP_FAT	regulation of growth	0.0452	10	148	629	19401	0.0502	0.623	2.08	1.00e+0	0.609	0.0225
GOTERM_BP_FAT	positive regulation of protein transport	0.0271	6	148	266	19401	0.0521	0.641	2.96	1.00e+0	0.627	0.0165
GOTERM_BP_FAT	regulation of molecular function	0.0814	18	148	1482	19401	0.0565	0.682	1.59	1.00e+0	0.667	0.0334
GOTERM_BP_FAT	angiogenesis	0.0317	7	148	361	19401	0.0571	0.682	2.54	1.00e+0	0.667	0.021
GOTERM_BP_FAT	T cell differentiation	0.0226	5	148	192	19401	0.0584	0.689	3.41	1.00e+0	0.674	0.016
GOTERM_BP_FAT	cellular response to starvation	0.0226	5	148	193	19401	0.0594	0.691	3.4	1.00e+0	0.676	0.0163
GOTERM_BP_FAT	blood vessel morphogenesis	0.0362	8	148	457	19401	0.0595	0.691	2.29	1.00e+0	0.676	0.0241
GOTERM_BP_FAT	cellular response to stress	0.0905	20	148	1715	19401	0.0599	0.693	1.53	1.00e+0	0.678	0.0369
GOTERM_BP_FAT	immunoglobulin mediated immune response	0.0226	5	148	194	19401	0.0603	0.695	3.38	1.00e+0	0.681	0.0166
GOTERM_BP_FAT	regulation of protein kinase activity	0.0317	7	148	367	19401	0.0609	0.7	2.5	1.00e+0	0.685	0.0227
GOTERM_BP_FAT	system process	0.1086	24	148	2176	19401	0.0622	0.712	1.45	1.00e+0	0.697	0.0407
GOTERM_BP_FAT	regulation of transferase activity	0.0362	8	148	464	19401	0.0634	0.724	2.26	1.00e+0	0.709	0.0261
GOTERM_BP_FAT	cell-cell adhesion	0.0407	9	148	561	19401	0.0639	0.726	2.1	1.00e+0	0.711	0.0283
GOTERM_BP_FAT	regulation of leukocyte proliferation	0.0271	6	148	283	19401	0.0645	0.728	2.78	1.00e+0	0.712	0.0216
GOTERM_BP_FAT	multicellular organismal-level homeostasis	0.0452	10	148	665	19401	0.0665	0.735	1.97	1.00e+0	0.719	0.0314
GOTERM_BP_FAT	positive regulation of intracellular signal transduction	0.0679	15	148	1188	19401	0.0669	0.735	1.66	1.00e+0	0.72	0.0378
GOTERM_BP_FAT	regulation of cell activation	0.0452	10	148	667	19401	0.0675	0.735	1.97	1.00e+0	0.72	0.032
GOTERM_BP_FAT	metal ion transport	0.0452	10	148	669	19401	0.0684	0.744	1.96	1.00e+0	0.728	0.0325
GOTERM_BP_FAT	circulatory system development	0.0588	13	148	980	19401	0.069	0.747	1.74	1.00e+0	0.731	0.037
GOTERM_BP_FAT	B cell activation	0.0226	5	148	204	19401	0.0698	0.751	3.21	1.00e+0	0.735	0.0202
GOTERM_BP_FAT	regulation of catalytic activity	0.0543	12	148	877	19401	0.0698	0.751	1.79	1.00e+0	0.735	0.0363
GOTERM_BP_FAT	epithelial cell development	0.0226	5	148	205	19401	0.0708	0.757	3.2	1.00e+0	0.741	0.0206
GOTERM_BP_FAT	transmembrane transport	0.0724	16	148	1317	19401	0.0743	0.772	1.59	1.00e+0	0.755	0.0437
GOTERM_BP_FAT	regulation of reproductive process	0.0226	5	148	209	19401	0.0748	0.772	3.14	1.00e+0	0.755	0.0222
GOTERM_BP_FAT	inorganic ion transmembrane transport	0.0498	11	148	784	19401	0.0749	0.772	1.84	1.00e+0	0.755	0.0379
GOTERM_BP_FAT	negative regulation of cell cycle process	0.0271	6	148	296	19401	0.0749	0.772	2.66	1.00e+0	0.755	0.0262
GOTERM_BP_FAT	positive regulation of transport	0.0543	12	148	890	19401	0.0757	0.777	1.77	1.00e+0	0.76	0.0399
GOTERM_BP_FAT	regulation of locomotion	0.0679	15	148	1213	19401	0.0764	0.779	1.62	1.00e+0	0.762	0.044
GOTERM_BP_FAT	cytoskeleton organization	0.0724	16	148	1323	19401	0.0766	0.779	1.59	1.00e+0	0.762	0.0452
GOTERM_BP_FAT	negative regulation of cell-cell adhesion	0.0226	5	148	214	19401	0.08	0.8	3.06	1.00e+0	0.783	0.0242
GOTERM_BP_FAT	positive regulation of apoptotic process	0.0407	9	148	590	19401	0.0802	0.8	2	1.00e+0	0.783	0.0372
GOTERM_BP_FAT	response to lipid	0.0543	12	148	900	19401	0.0805	0.8	1.75	1.00e+0	0.783	0.0428
GOTERM_BP_FAT	regulation of system process	0.0407	9	148	595	19401	0.0833	0.82	1.98	1.00e+0	0.803	0.0389
GOTERM_BP_FAT	regulation of localization	0.1041	23	148	2146	19401	0.0872	0.831	1.4	1.00e+0	0.813	0.0584
GOTERM_BP_FAT	positive regulation of cell population proliferation	0.0588	13	148	1021	19401	0.0873	0.831	1.67	1.00e+0	0.813	0.0486
GOTERM_BP_FAT	negative regulation of phosphorylation	0.0226	5	148	221	19401	0.0876	0.831	2.97	1.00e+0	0.813	0.0274
GOTERM_BP_FAT	response to hypoxia	0.0271	6	148	312	19401	0.089	0.84	2.52	1.00e+0	0.822	0.0327
GOTERM_BP_FAT	positive regulation of programmed cell death	0.0407	9	148	607	19401	0.0909	0.843	1.94	1.00e+0	0.825	0.0433
GOTERM_BP_FAT	regulation of anatomical structure morphogenesis	0.0543	12	148	921	19401	0.091	0.843	1.71	1.00e+0	0.825	0.0495
GOTERM_BP_FAT	export from cell	0.0362	8	148	508	19401	0.092	0.843	2.06	1.00e+0	0.825	0.0412
GOTERM_BP_FAT	positive regulation of innate immune response	0.0271	6	148	316	19401	0.0927	0.843	2.49	1.00e+0	0.825	0.0344
GOTERM_BP_FAT	positive regulation of response to external stimulus	0.0407	9	148	611	19401	0.0935	0.843	1.93	1.00e+0	0.825	0.0448
GOTERM_BP_FAT	tube morphogenesis	0.0452	10	148	717	19401	0.0952	0.847	1.83	1.00e+0	0.829	0.0482
GOTERM_BP_FAT	regulation of protein modification process	0.0543	12	148	929	19401	0.0952	0.847	1.69	1.00e+0	0.829	0.0522
GOTERM_BP_FAT	regulation of transport	0.086	19	148	1709	19401	0.0958	0.847	1.46	1.00e+0	0.829	0.0615
GOTERM_BP_FAT	negative regulation of defense response	0.0271	6	148	320	19401	0.0965	0.848	2.46	1.00e+0	0.83	0.0363
GOTERM_BP_FAT	negative regulation of signaling	0.0814	18	148	1598	19401	0.097	0.849	1.48	1.00e+0	0.831	0.0614
GOTERM_BP_FAT	negative regulation of cell communication	0.0814	18	148	1599	19401	0.0974	0.849	1.48	1.00e+0	0.831	0.0617
GOTERM_BP_FAT	negative regulation of cell adhesion	0.0271	6	148	321	19401	0.0975	0.849	2.45	1.00e+0	0.831	0.0367
GOTERM_BP_FAT	regulation of cell population proliferation	0.0905	20	148	1830	19401	0.0983	0.852	1.43	1.00e+0	0.834	0.0642
